# Supplementary material for: Understanding the spatiotemporal pattern of grazing cattle movement
Source: PubMed Central journal article supplement (PMC4995401; doi:10.1038/srep31967), 2016-08-24
Supplement: srep31967-s1.pdf [file srep31967-s1.pdf]

# Supporting information

*Understanding the spatiotemporal pattern of grazing cattle movement*

By Kun Zhao, Raja Jurdak

**Table S1.** The AIC weights for the population trip length distribution

| $\Delta t$ | Powerlaw | Truncated powerlaw | Exponential | Hybrid exponential |
|------------|----------|--------------------|-------------|--------------------|
| 60         | 0.00     | 0.00               | 0.00        | <b>1.00</b>        |
| 120        | 0.00     | 0.00               | 0.00        | <b>1.00</b>        |
| 180        | 0.00     | 0.00               | 0.00        | <b>1.00</b>        |

**Table S2.** The AIC weights for the population waiting time distribution

| $\Delta t$ | Powerlaw    | Truncated powerlaw | Exponential |
|------------|-------------|--------------------|-------------|
| 60         | 0.00        | <b>1.00</b>        | 0.00        |
| 120        | 0.00        | <b>1.00</b>        | 0.00        |
| 180        | <b>0.52</b> | 0.48               | 0.00        |

**Table S3.** The AIC weights for the individual trip length distribution

| Cow ID | Powerlaw | Truncated powerlaw | Exponential | Hybrid exponential |
|--------|----------|--------------------|-------------|--------------------|
| 0      | 0.00     | 0.40               | 0.00        | <b>0.60</b>        |
| 1      | 0.00     | 0.01               | 0.00        | <b>0.99</b>        |
| 2      | 0.00     | 0.06               | 0.00        | <b>0.94</b>        |
| 4      | 0.00     | 0.35               | 0.00        | <b>0.65</b>        |
| 5      | 0.00     | 0.08               | 0.00        | <b>0.92</b>        |
| 6      | 0.00     | 0.23               | 0.00        | <b>0.77</b>        |
| 7      | 0.00     | 0.05               | 0.00        | <b>0.95</b>        |
| 8      | 0.00     | 0.14               | 0.00        | <b>0.86</b>        |
| 9      | 0.00     | 0.01               | 0.00        | <b>0.99</b>        |
| 10     | 0.00     | 0.11               | 0.00        | <b>0.89</b>        |
| 12     | 0.00     | 0.47               | 0.00        | <b>0.53</b>        |
| 13     | 0.00     | 0.14               | 0.00        | <b>0.86</b>        |
| 14     | 0.00     | 0.01               | 0.00        | <b>0.99</b>        |
| 16     | 0.00     | 0.40               | 0.00        | <b>0.60</b>        |
| 17     | 0.00     | 0.22               | 0.00        | <b>0.78</b>        |
| 18     | 0.00     | 0.02               | 0.00        | <b>0.98</b>        |
| 19     | 0.00     | 0.05               | 0.00        | <b>0.95</b>        |
| 20     | 0.00     | 0.03               | 0.00        | <b>0.97</b>        |
| 21     | 0.00     | 0.01               | 0.00        | <b>0.99</b>        |
| 22     | 0.00     | <b>0.56</b>        | 0.00        | 0.44               |
| 23     | 0.00     | 0.33               | 0.00        | <b>0.67</b>        |
| 24     | 0.00     | 0.22               | 0.00        | <b>0.78</b>        |
| 25     | 0.00     | 0.00               | 0.00        | <b>1.00</b>        |
| 26     | 0.00     | 0.02               | 0.00        | <b>0.98</b>        |
| 27     | 0.00     | 0.01               | 0.00        | <b>0.99</b>        |
| 29     | 0.00     | 0.17               | 0.00        | <b>0.83</b>        |
| 30     | 0.00     | 0.45               | 0.00        | <b>0.55</b>        |
| 32     | 0.00     | 0.27               | 0.00        | <b>0.73</b>        |
| 33     | 0.00     | 0.22               | 0.00        | <b>0.78</b>        |

**Table S4.** The AIC weights for the individual trip time distribution

| Cow ID | Powerlaw | Truncated powerlaw | Exponential | Hybrid exponential |
|--------|----------|--------------------|-------------|--------------------|
| 0      | 0.00     | 0.00               | 0.00        | <b>1.00</b>        |
| 1      | 0.00     | 0.00               | 0.00        | <b>1.00</b>        |
| 2      | 0.00     | 0.00               | 0.00        | <b>1.00</b>        |
| 4      | 0.00     | 0.00               | 0.00        | <b>1.00</b>        |
| 5      | 0.00     | 0.00               | 0.00        | <b>1.00</b>        |
| 6      | 0.00     | 0.00               | 0.00        | <b>1.00</b>        |
| 7      | 0.00     | 0.00               | 0.00        | <b>1.00</b>        |
| 8      | 0.00     | 0.00               | 0.00        | <b>1.00</b>        |
| 9      | 0.00     | 0.00               | 0.00        | <b>1.00</b>        |
| 10     | 0.00     | 0.00               | 0.00        | <b>1.00</b>        |
| 12     | 0.00     | 0.00               | 0.00        | <b>1.00</b>        |
| 13     | 0.00     | 0.00               | 0.00        | <b>1.00</b>        |
| 14     | 0.00     | 0.00               | 0.00        | <b>1.00</b>        |
| 16     | 0.00     | 0.00               | 0.00        | <b>1.00</b>        |
| 17     | 0.00     | 0.00               | 0.00        | <b>1.00</b>        |
| 18     | 0.00     | 0.00               | 0.00        | <b>1.00</b>        |
| 19     | 0.00     | 0.00               | 0.00        | <b>1.00</b>        |
| 20     | 0.00     | 0.00               | 0.00        | <b>1.00</b>        |
| 21     | 0.00     | 0.00               | 0.00        | <b>1.00</b>        |
| 22     | 0.00     | 0.00               | 0.00        | <b>1.00</b>        |
| 23     | 0.00     | 0.00               | 0.00        | <b>1.00</b>        |
| 24     | 0.00     | 0.00               | 0.00        | <b>1.00</b>        |
| 25     | 0.00     | 0.00               | 0.00        | <b>1.00</b>        |
| 26     | 0.00     | 0.00               | 0.00        | <b>1.00</b>        |
| 27     | 0.00     | 0.00               | 0.00        | <b>1.00</b>        |
| 29     | 0.00     | 0.00               | 0.00        | <b>1.00</b>        |
| 30     | 0.00     | 0.00               | 0.00        | <b>1.00</b>        |
| 32     | 0.00     | 0.00               | 0.00        | <b>1.00</b>        |
| 33     | 0.00     | 0.00               | 0.00        | <b>1.00</b>        |

**Table S5.** The AIC weights for the individual waiting time distribution

| Cow ID | Powerlaw    | Truncated powerlaw | Exponential |
|--------|-------------|--------------------|-------------|
| 0      | <b>0.66</b> | 0.34               | 0.00        |
| 1      | <b>0.66</b> | 0.34               | 0.00        |
| 2      | <b>0.71</b> | 0.29               | 0.00        |
| 4      | <b>0.72</b> | 0.28               | 0.00        |
| 5      | <b>0.68</b> | 0.32               | 0.00        |
| 6      | <b>0.66</b> | 0.34               | 0.00        |
| 7      | 0.49        | <b>0.51</b>        | 0.00        |
| 8      | <b>0.73</b> | 0.27               | 0.00        |
| 9      | <b>0.73</b> | 0.27               | 0.00        |
| 10     | <b>0.66</b> | 0.34               | 0.00        |
| 12     | <b>0.62</b> | 0.38               | 0.00        |
| 13     | <b>0.58</b> | 0.42               | 0.00        |
| 14     | <b>0.66</b> | 0.34               | 0.00        |
| 16     | <b>0.73</b> | 0.27               | 0.00        |
| 17     | <b>0.73</b> | 0.27               | 0.00        |
| 18     | <b>0.72</b> | 0.28               | 0.00        |
| 19     | 0.48        | <b>0.52</b>        | 0.00        |
| 20     | 0.48        | <b>0.52</b>        | 0.00        |
| 21     | <b>0.71</b> | 0.29               | 0.00        |
| 22     | 0.36        | <b>0.64</b>        | 0.00        |
| 23     | 0.47        | <b>0.53</b>        | 0.00        |
| 24     | <b>0.61</b> | 0.39               | 0.00        |
| 25     | <b>0.70</b> | 0.30               | 0.00        |
| 26     | <b>0.70</b> | 0.30               | 0.00        |
| 27     | <b>0.71</b> | 0.29               | 0.00        |
| 29     | <b>0.68</b> | 0.32               | 0.00        |
| 30     | 0.49        | <b>0.51</b>        | 0.00        |
| 32     | <b>0.62</b> | 0.38               | 0.00        |
| 33     | <b>0.62</b> | 0.38               | 0.00        |
